# Aryl hydrocarbon receptor regulates histone deacetylase 8 expression to repress tumor suppressive activity in hepatocellular carcinoma

This article has been corrected. Correction in: [Oncotarget. 2018; 9:37807-37807.](#)

Li-Ting Wang<sup>1</sup>, Shyh-Shin Chiou<sup>2,3</sup>, Chee-Yin Chai<sup>4</sup>, Edward Hsi<sup>5</sup>, Shen-Nien Wang<sup>1,6,7</sup>, Shau-Ku Huang<sup>8,9</sup>, Shih-Hsien Hsu<sup>1,9,10</sup>

<sup>1</sup>Graduate Institute of Medicine, College of Medicine, Kaohsiung Medical University, Kaohsiung 807, Taiwan

<sup>2</sup>Department of Pediatrics, Faculty of Medicine, College of Medicine, Kaohsiung Medical University, Kaohsiung 807, Taiwan

<sup>3</sup>Division of Hematology-Oncology, Department of Pediatrics, Kaohsiung Medical University Hospital, Kaohsiung 807, Taiwan

<sup>4</sup>Department of Pathology, Faculty of Medicine, College of Medicine, Kaohsiung Medical University, Kaohsiung 807, Taiwan

<sup>5</sup>Department of Genome Medicine, College of Medicine, Kaohsiung Medical University, Kaohsiung 807, Taiwan

<sup>6</sup>Division of Hepatobiliary Surgery, Department of Surgery, Kaohsiung Medical University, Kaohsiung 807, Taiwan

<sup>7</sup>Department of Surgery, faculty of Medicine, Kaohsiung Medical University Hospital, Kaohsiung 807, Taiwan

<sup>8</sup>Division of Environmental Health and Occupational Medicine, National Health Research Institutes, Zhunan 115, Taiwan

<sup>9</sup>Center for Environmental Medicine, Kaohsiung Medical University, Kaohsiung 807, Taiwan

<sup>10</sup>Center of Infectious Disease and Cancer Research (CICAR), Kaohsiung Medical University, Kaohsiung 807, Taiwan

**Correspondence to:** Shih-Hsien Hsu, **email:** jackhsu@kmu.edu.tw  
Shau-Ku Huang, **email:** skhuang@nhri.org.tw  
Shen-Nien Wang, **email:** snwang@cc.kmu.edu.tw

**Keywords:** AHR, HDAC8, hepatocellular carcinoma (HCC)

**Received:** February 05, 2016

**Accepted:** May 20, 2016

**Published:** June 06, 2016

## ABSTRACT

**Histone deacetylase 8 (HDAC8), a unique member of class I histone deacetylases, shows remarkable correlation with advanced disease stage and multiple malignant tumors. However, little is known about the contribution of HDAC8 to the tumorigenesis of hepatocellular carcinoma (HCC). The present study investigated the expression of HDAC8 regulated by the aryl hydrocarbon receptor (AHR) in HCC cell lines and tissues, and the roles of HDAC8 overexpression in cell proliferation, including potentially underlying mechanisms. We assessed the correlation between the clinic-pathological parameters and the expression of AHR and HDAC8. Further, we analyzed the AHR siRNA transfection and HDAC8 inhibitors to explore the functions of HDAC8 in HCC progression *in vitro* and *in vivo*. In a panel of 289 HCC patients, HDAC8 was shown to be highly correlated with AHR expression at both mRNA and protein levels. HCC patients with high AHR expression showed a shorter survival time than that with low AHR expression. We then found that the expression of both AHR and HDAC8 was significantly upregulated in both HCC cell lines and tumor tissues compared to human normal hepatocytes and matched non-tumor tissues. Furthermore, HDAC8 inhibition remarkably inhibited hepatoma cell proliferation and transformation activity via upregulation of RB1 *in vitro* and *in vivo*. Our data revealed an important role of the AHR-HDAC8 axis in promoting HCC tumorigenesis, thus identifying HDAC8 as a potential therapeutic target for HCC treatment.**

## INTRODUCTION

The liver is the major organ involved in the metabolism of xenobiotics resulting from environmental

pollution or dietary intake. A multitude of xenobiotics and their metabolites have detrimental and tumorigenic effects on hepatocytes and may cause liver tumor formation [1]. The aryl hydrocarbon receptor (AHR),

a unique cellular chemical sensor in most organs, is a cytosolic basic helix–loop–helix/Per–Arnt–Sim transcriptional factor [2]. It can be activated by numerous environmental pollutants, including polycyclic aromatic hydrocarbons and a diverse set of endogenous metabolites [3, 4]. AHR resides in the cytoplasm in its resting state and upon encountering ligands, it is translocated to the nucleus where it heterodimerizes with the AHR nuclear translocator (ARNT) [5] and activates the expression of a battery of genes containing specific DNA-enhancer sequences, which are known as xenobiotic-responsive elements (XREs) [6]. These downstream genes include those encoding phase I and phase II enzymes [7] that are involved in the cellular detoxification process, where toxic and carcinogenic metabolites can be generated, which may play an important role in multiple stages of tumor progression in humans and experimental models [2, 7]. In addition to cellular detoxification, AHR is known to regulate signal transduction pathways involved in cellular metabolism, proliferation, differentiation, and apoptosis. Disruption of the AHR cellular functions is also associated with the expression of various diseases [7, 8]. Several studies have shown that dysregulation of AHR in hepatocytes leads to steatosis and aberrant cholesterol metabolism [9–11], and increased expression of AHR and its binding partner, ARNT, has been noted in hepatocellular carcinoma (HCC) [12]. However, the pathogenic mechanisms and the possible prognostic value of *AHR* expression in HCC are yet to be elucidated.

Histone deacetylases (HDACs), a family of enzymes with the ability to remove acetyl groups from lysine on histones and other proteins to repress downstream gene expression by wrapping the DNA more tightly, substantially contribute to the onset and progression of human diseases [13, 14]. In humans, HDACs are grouped in four classes of proteins: class I, IIa, IIb, III, and IV [15–17]. HDAC8, a class I zinc-dependent HDAC, typically induces histone deacetylation and represses gene transcription [18, 19]. HDAC8 is restricted to specific cell types exhibiting smooth muscle differentiation in normal human tissues. Loss of *HDAC8* activity has been shown to result in increased SMC3 acetylation and inefficient dissolution of cohesin complexes [20]. Aberrant upregulation of *HDAC8* was suggested to be correlated with NAFLD-associated HCC development [21]. Although HDAC8 has been shown to promote growth of numerous cancer types and contribute to poor prognosis in childhood neuroblastoma [22–24], the molecular actions of HDAC8 in cancer remained poorly defined.

In this study, we provide evidences that suggest a plausible mechanism linking AHR and HCC via targeting of *HDAC8*, which promotes tumor cell growth and may

restrain the expression of RB1 tumor suppressors in HCCs.

## RESULTS

### HDAC8 showed tumor-specific expression pattern correlated with HCC clinical outcome

AHR, a major chemical sensor receptor, is known to regulate signal transduction pathways involved in cellular metabolism, proliferation, differentiation, and apoptosis [3, 4]. Disruption of the cellular functions of AHR is also associated with the expression of various diseases, including HCC [25]. The underlying regulatory mechanisms of tumorigenesis remain unclear. To investigate the mechanism of the oncogenic action of AHR, we analyzed the gene expression patterns in paired samples of tumors from the high and low *AHR* group by microarray analysis. The expression of epigenetic genes, *HDAC8*, was elevated in high-*AHR* HCC tumors but decreased in the tumor suppressor genes *RB1* and *p53* (Figure 1A). To investigate the correlation and clinical outcome between the expression of *AHR* and *HDAC8*, the mRNAs for these genes were examined in a panel of 289 paired HCC tumor samples (tumor paired with neighbor “healthy” liver tissues). Analysis of the expression patterns of *HDAC8* in various tissue samples first showed that *HDAC8* mRNA expression in HCC liver samples was significantly upregulated as compared with that in non-HCC patients (Figure 1B;  $p = 0.0008$ , one-way ANOVA), while the expression pattern of *HDAC8* in HCC samples varied greatly. In fact, analysis of the dichotomized group with the *HDAC8* expression at the top 20 percentile ( $n = 56$ ; “high *HDAC8*”) showed distinct clinical features compared with those of the remaining HCC patients ( $n = 230$ ; “low *HDAC8*”). As shown in Table 1, when the two groups and the non-HCC subjects were compared, significant differences were observed in the levels of albumin ( $p = 0.0062$ ) and lymph vascular invasion ( $p = 0.0163$ ) as well as in tumor size ( $p = 0.002$ ), tumor number ( $p = 0.0429$ ), and tumor grade ( $p = 0.001$ ), but not in age, sex, or the levels of GOT, alkaline phosphatase, triglyceride, g-GT, AC sugar, bilirubin, and cholesterol (Table 1). Further, HDAC8 expression in tumor samples showed a tumor-specific expression pattern in HCC tumor masses (indicated in brown; T) compared with the adjacent healthy liver tissues (N) and negative mouse IgG (Supplementary Figure S1), and HDAC8 expression was detected in both the cytoplasm and nucleus (yellow arrow) of tumor cells (Figure 1C). The analysis of the survival curves of HCC patients showed a significantly shorter survival time after surgical resection for patients in high *HDAC8* groups than in the low *HDAC8* expression groups (Figure 1D,  $p = 0.0004$ ).

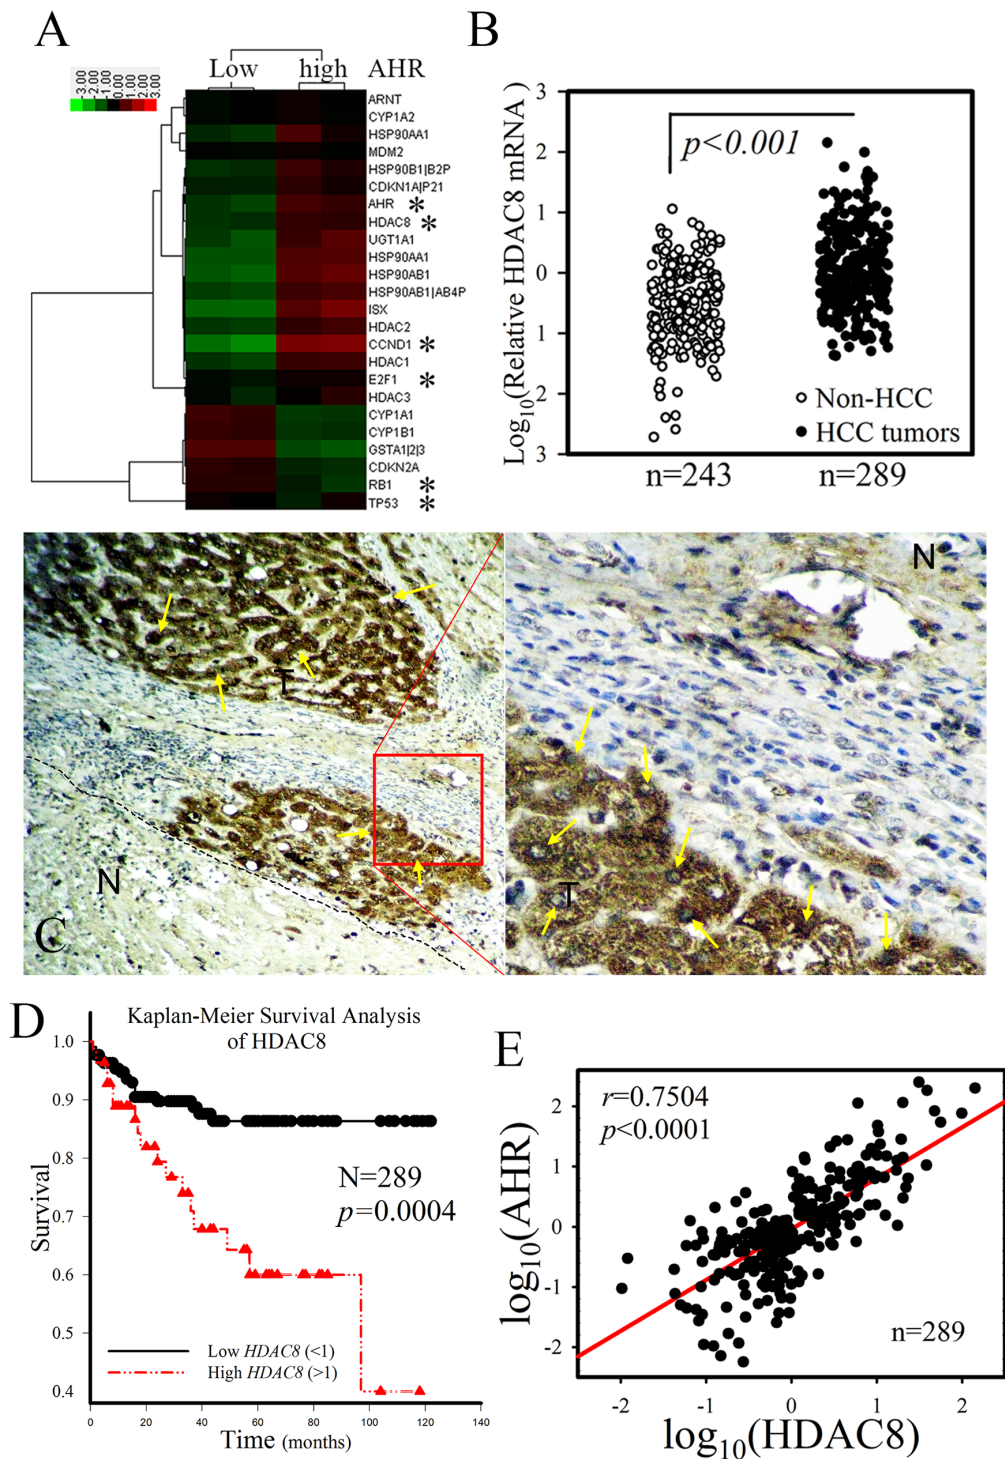

**Figure 1: HDAC8 showed a tumor-specific expression pattern and strong correlation with the clinical outcome of HCC patients.** **A.** Heat map analysis of cDNA microarray data of “high” *AHR* HCC tumors compared with data from adjacent samples of healthy liver tissue. High *HDAC8* mRNA expression was detected in HCC tumors with high *AHR* expression. **B.** *HDAC8* mRNA was overexpressed in HCC tumor samples compared with non-HCC liver samples. **C.** *HDAC8* expression showed a tumor-specific pattern in HCC tumor samples. *HDAC8*, brown; *HDAC8* (nuclei), yellow arrow; N, adjacent healthy liver tissue. **D.** High *HDAC8* mRNA expression in HCC is associated with a shorter survival time in HCC patients than that associated with low *HDAC8* mRNA expression (Kaplan–Meier survival analysis). **E.** *HDAC8* expression showed a high correlation with *AHR* mRNA expression. The *HDAC8* mRNA expression in HCC tumors with high *AHR* mRNA expression was significantly higher than that in tumors with low *AHR* mRNA expression.

**Table 1: Baseline characteristics of 289 hepatocellular carcinoma (HCC) patients and 243 non-hepatocellular carcinoma patients**

| Group                   | Non-HCC<br>(n=243) (%) | HDAC8 mRNA<br>(Low, n=230)(%) | HDAC8 mRNA<br>(High; n=59)(%) | p-value  |
|-------------------------|------------------------|-------------------------------|-------------------------------|----------|
| Age (mean(SD))          | 61.6±5.04              | 57.9±2.3                      | 59.9±1.4                      | 0.6851   |
| Sex                     |                        |                               |                               |          |
| Male                    | 154(63.37)             | 164(71.30)                    | 48(81.36)                     | 0.6017 # |
| Female                  | 89(36.63)              | 66(28.70)                     | 11(18.64)                     |          |
| GOT (U/L)               |                        |                               |                               |          |
| <40                     | 214(88.06)             | 94(40.87)                     | 19(32.20)                     | 0.2670#  |
| 40≤<100                 | 16(6.58)               | 102(44.35)                    | 26(44.07)                     |          |
| 100≤                    | 13(5.36)               | 34(14.78)                     | 14(23.73)                     |          |
| GPT (U/L)               |                        |                               |                               |          |
| <40                     | 216(88.89)             | 85(36.96)                     | 21(35.59)                     | 0.8844#  |
| 40≤<100                 | 14(5.76)               | 106(46.09)                    | 26(44.07)                     |          |
| 100≤                    | 13(5.35)               | 39(16.95)                     | 12(20.34)                     |          |
| Albumin (mg/dL)         |                        |                               |                               |          |
| <4.5                    | 219(90.12)             | 195(84.78)                    | 57(96.61)                     | 0.0062*# |
| ≥4.5                    | 24(9.88)               | 35(15.22)                     | 2(3.39)                       |          |
| α-Fetoprotein (ng/mL)   |                        |                               |                               |          |
| <20                     | 218(89.72)             | 130(56.52)                    | 34(57.63)                     | 0.8909#  |
| ≥20                     | 25(10.28)              | 100(43.48)                    | 25(42.37)                     |          |
| Bilit                   |                        |                               |                               |          |
| 1.5<                    | 132(54.32)             | 189(82.17)                    | 50(84.75)                     | 0.8223#  |
| ≥1.5                    | 111 (45.68)            | 41(17.83)                     | 9(15.25)                      |          |
| Lymphovascular invasion |                        |                               |                               |          |
| No                      | 243(100)               | 165(71.74)                    | 32(57.14)                     | 0.0163*# |
| Yes                     | 0                      | 65(28.26)                     | 27(45.76)                     |          |
| Size(cm)                |                        |                               |                               |          |
| <2.5                    |                        | 82(35.65)                     | 8(13.56)                      | 0.0020*  |
| 2.5≤                    |                        | 148(64.35)                    | 51(86.44)                     |          |
| Number of tumors        |                        |                               |                               |          |
| 1                       |                        | 181 (78.70)                   | 39(66.10)                     | 0.0429*  |
| 1<                      |                        | 49(21.30)                     | 20(33.90)                     |          |
| Modified TNM            |                        |                               |                               |          |
| I                       |                        | 153(66.52)                    | 23(38.98)                     | <0.001*  |
| II                      |                        | 61(26.52)                     | 20(33.90)                     |          |
| III(IIIA and IIIB)      |                        | 16(6.96)                      | 16(27.12)                     |          |

#p values were calculated by Fisher exact test

High HDAC8 mRNA expression patients: HDAC8 mRNA expression in tumor part were higher three point six folds (>3.6 folds) than adjacent normal part liver tissue.

Low HDAC8 mRNA expression patients: HDAC8 mRNA expression in tumor part were lesser three point six folds (<3.6 folds) than adjacent normal part liver tissue. (cut point by survival ROC curve)

\*p<0.05.

Patients:289HCC patients from two medical centers [Chung Ho Memorial Hospital (255HCC) and Changhua Christian Hospital (34 HCC)] were enrolled into the HDAC8 cohort study from July 2007 to July 2015.

## HDAC8 mRNA expression correlated with AHR expression

The expression of *HDAC8* mRNA strongly correlated with the expression of *AHR* in HCC patients (Person's correlation coefficient,  $r = 0.7504$ ,  $p < 0.001$ ; Figure 1E). In 8 randomly selected HCC samples obtained from patients in the high *AHR* group, the increased *HDAC8* expression correlated with the expression pattern of *AHR* when compared with those of paired tumor-adjacent, normal tissues (Figure 2A). The expression correlation between *AHR* and *HDAC8* was further

verified by immunofluorescence staining of HCC patient tumor tissue. High level of *AHR* expression was noted in tumor cells co-expressing high level of *HDAC8* (Figure 2B). *HDAC8* mRNA expression in tumors of the "high *AHR*" group was significantly higher than that in the "low *AHR*" group (Figure 2C). Analysis of the dichotomized group ("high *AHR*" vs. "low *AHR*" expression) placed the expression of *HDAC8*, *p53*, *RB1*, *E2F1*, and *CCND1* in the top 25 percentile ( $n = 57$ ; "high *AHR*"). *HDAC8* expression and expression of *CCND1* and *E2F1* in tumors of the "high *AHR*" group were significantly higher than in the "low *AHR*" group ( $n = 232$ ; "low *AHR*," Figure 2D).

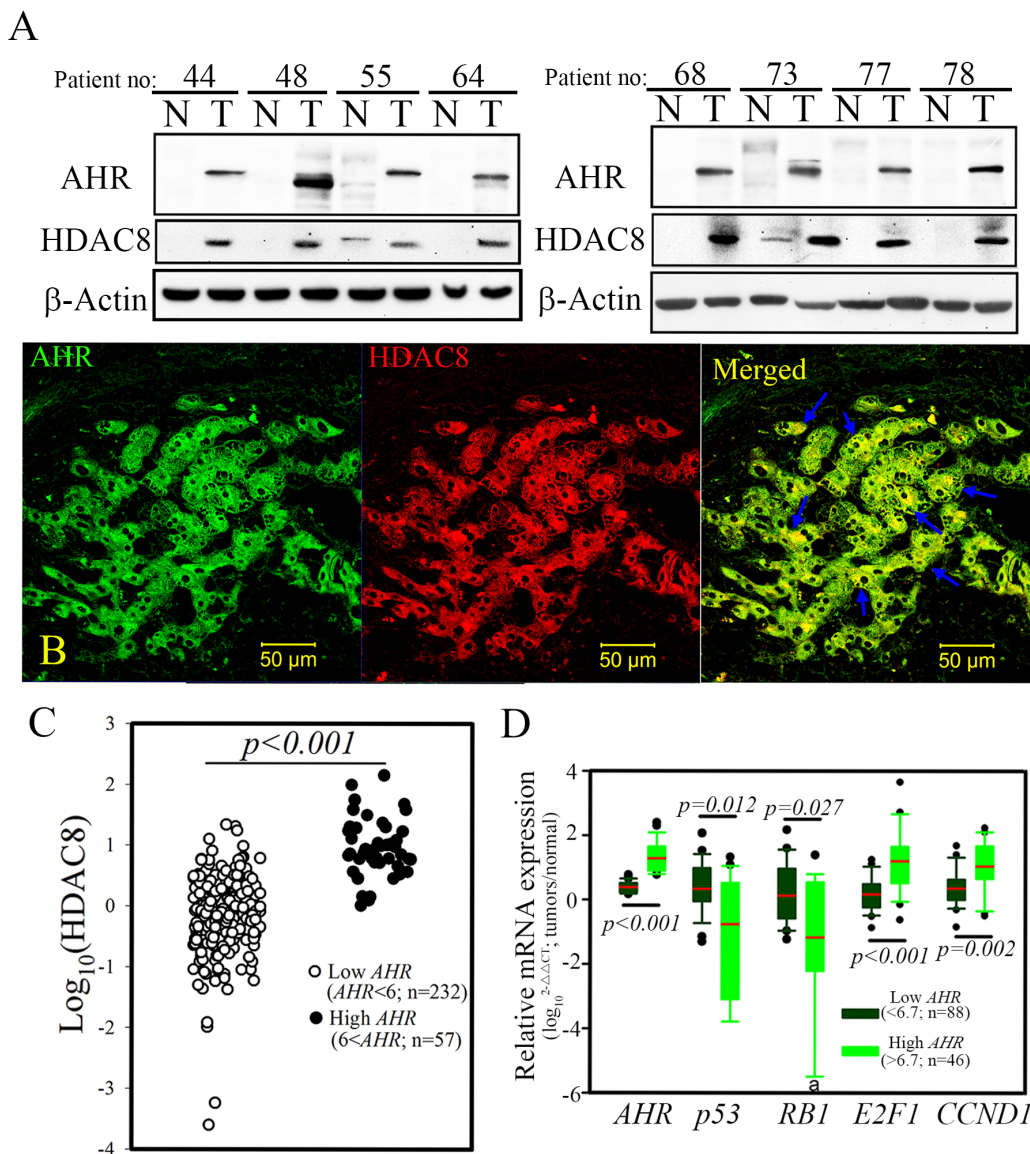

**Figure 2: Ectopic HDAC8 expression showed a high correlation with AHR in hepatocellular carcinoma (HCC).** **A.** Overexpression of HDAC8 protein was detected in HCC patients with high *AHR* mRNA expression. **B.** The expression pattern of HDAC8 showed significant co-localization with *AHR* in tumor cells of HCC patients. HDAC8, red; *AHR*, green. **C.** High levels of *HDAC8* mRNA were detected in HCC patients exhibiting high *AHR* mRNA expression. **D.** High *AHR* expression coupled with high proto-oncogenes (*CCND1* and *E2F1*) expression but with lower tumor suppressor gene (*p53* and *RB1*) expression in HCC patients. a, six samples from the high *AHR* group could not be detected.

*RB1* and *p53* expression showed opposite correlation in HCC tumors (Figure 2D).

### AHR-ARNT1 complex genetically activated HDAC8 expression

To explore the potential functional relationship between AHR and HDAC8, analyses of the expression patterns of AHR and HDAC8 were first examined in hepatoma cell lines. Analyses of seven hepatoma cell lines (Hep G2, Hep 3B, SK-Hep1, Huh 7, PLC/PRF/5, HA22T, and HCC36) revealed that AHR and HDAC8 were highly expressed in all of the hepatoma cell lines as compared with expression levels in normal hepatocytes (Chang normal liver cells, CNL; Figure 3A). Moreover, when hepatoma cells (SK-Hep1) were treated with TCDD, a prototypical AHR ligand, expressions of HDAC8 and the classical AHR target gene *CYP1B1* were increased in hepatoma cells in a time-dependent manner, both at protein level (Figure 3B). To determine whether AHR activated *HDAC8* via a genetic mechanism, we transfected an *AHR* expression construct into hepatoma cells, and the mRNA and protein levels of *HDAC8* were measured by real-time PCR and western blotting, respectively, in *AHR*-overexpressing cells. As shown in Figure 3C and 3D, forced *AHR* overexpression enhanced mRNA and protein expression of *CYP1B1* and *HDAC8* in both hepatoma cell lines. The protein level of *HDAC8* was also increased when *AHR-GFP* overexpression (induced by a Tet-on system) was induced by different concentrations of doxycycline (0.3 and 1  $\mu\text{g}/\text{mL}$ ) for 8 h (Figure 3E). Interestingly, reduction in the expression levels of two tumor suppressors, *RB1* and *p53*, was also noted in *AHR*-overexpressing hepatoma cells. This was consistent with the finding that in HCC clinical samples, the expression levels of *RB1* and *p53* were significantly lower in the “high *AHR* group” in comparison to those in the “low *AHR* group,” suggesting the existence of an inverse relationship between high and low *AHR* expression of these two tumor suppressors.

To further explore and verify the regulatory effects of AHR on *HDAC8* expression, we used a promoter assay and chromatin immunoprecipitation (ChIP) to analyze the potential transcriptional regulatory elements to which AHR binds in the *HDAC8* promoter. A *HDAC8* promoter with serial deletions was inserted into a luciferase expression construct to identify the regulatory promoter region that is controlled by AHR (Figure 3F). AHR significantly increased *HDAC8* promoter-driven luciferase activity ( $11.89 \pm 1.74$ ) of the expression constructs with a promoter sequence longer than 168 bp (Figure 3F). Analysis of the *HDAC8* promoter region between positions  $-168$  and  $+30$  identified one classical XRE (T/GNGCGTGA/CG/CA) in the locus comprising  $-108$  to  $-125$ . The transactivation effect of AHR on the XRE element of the *HDAC8* promoter was further confirmed

by a promoter binding assay. As shown in Figure 4A, the *HDAC8* promoter regions (positions  $-168$  to  $+30$ ) were pulled down by an anti-AHR polyclonal antibody in SK-Hep1 hepatoma cell lines transfected with *AHR*. In contrast, the *HDAC8* promoter region was not pulled down if XRE was deleted (Figure 4A). The AHR binding to *HDAC8* promoter regions *in vivo* were analyzed using ChIP analysis. The *HDAC8* promoter region between  $-168$  and  $+30$  bp was pulled down by the anti-AHR antibody in hepatoma cells with high *HDAC8* expression (Figure 4B).

### HDAC8 downregulated RB1 expression via direct promoter binding

To explore the potential functional relationship between HDAC8 and *RB1*, analyses of the expression patterns of HDAC8 and *RB1* were first examined in hepatoma cell lines. An *HDAC8* expression construct was transfected into hepatoma cells, and the levels of *RB1* were measured by Western blotting in *HDAC8*-overexpressing cells. As shown in Figure 4C, forced *HDAC8* overexpression suppressed protein expression of *RB1* in hepatoma cell lines. Also, the *RB1* promoter regions (positions  $-250$  to  $+30$ ) were pulled down by the anti-*HDAC8* polyclonal antibody in SK-Hep1 hepatoma cell lines transfected with *GFP-tagged HDAC8* (Figure 4D). Our data showed that the induction of AHR activated cellular expression of HDAC8 and consequently suppressed *RB1* expression in hepatoma cells. However, it remained unclear whether the expression of HDAC8 occurs in an AHR-dependent manner under physiological conditions. To address this question, the expression of *Arnt1*, *Cyp1b1*, and *Hdac8* was analyzed in hepatocytes from *Ahr*-wild type (*Ahr*<sup>+/+</sup>) or-null (*Ahr*<sup>-/-</sup>) mice. Results revealed dramatically reduced protein and mRNA levels for all parameters in *Ahr*-null hepatocytes compared with those of *Ahr*<sup>+/+</sup> or *Ahr*<sup>+/-</sup> cells (Figure 4E). In fact, hepatocytes from *Ahr*<sup>+/-</sup> heterozygotes also showed lower levels of gene expression when compared with those of *Ahr*-wild type cells (Figure 4E). To test if the inhibition of *RB1* and HDAC8 expression was directly affected by *Ahr*, hepatocytes isolated from *Ahr*-wild type and *Ahr*-null mice were treated with dioxin. As shown in Figure 4F, increased HDAC8, but decreased *Rb1*, expression was found in dioxin-treated *Ahr*-wild type primary hepatocytes but not in those from *Ahr*-null mice. The modulation regulatory effect of *RB1* by HDAC8 was finally determined in hepatoma cells with ectopic *HDAC8* expression but transfected with *AHR* shRNAi. The hepatoma cells (SK-Hep1) with ectopic HDAC8 expression reversed the enhancing effects of AHR knockdown on the expression of *RB1* and *p53* (Figure 4G). These results indicated that *HDAC8* are direct physiological targets of *Ahr* and that *Rb1* in turn regulates cellular proliferation as a consequence of Ahr activation.

### The AHR-HDAC8 axis regulated tumor proliferation and transformation in vitro and in vivo

To explore the potential tumorigenic activity of the AHR-HDAC8 axis, an inducible expression system

overexpressing *AHR*, a constitutively activated AHR mutant (*CA1*) [10], and *HDAC8* was tested in two HCC cell lines (Hep 3B and SK Hep1). After treatment of the cells with doxycycline (1  $\mu$ g/mL) for 8 h, overexpression of AHR or the CA1 mutant significantly enhanced BrdU incorporation by 47.9% and 97.8%, respectively, as

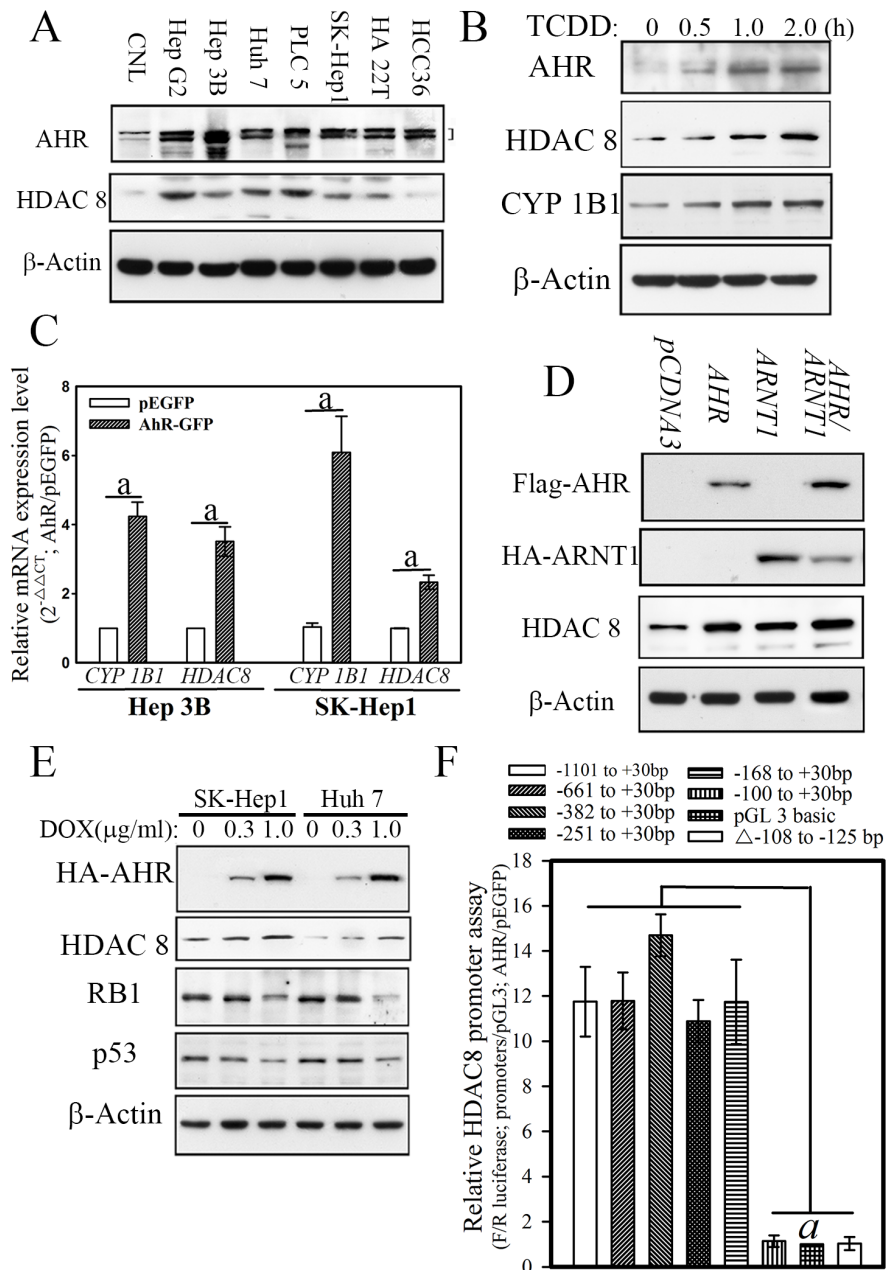

**Figure 3: AHR directly activated cellular HDAC8 expression via the AHR-ARNT complex in hepatoma cells.** a,  $p < 0.001$ . **A.** AHR expression in hepatoma cell lines showed strong correlation with the expression of HDAC8 in Hep G2, Hep 3B, SK-Hep1, Huh 7, PLC/PRE/5, and HA22T are HCC cell lines. **B.** AHR activation induced by TCDD increased cellular CYP1B1 and HDAC8 protein levels in hepatoma cells. **C.** Forced AHR expression increased the mRNA expression of the downstream genes *CYP1B1* and *HDAC8*. **D.** Forced *AHR* expression increased the protein expression of the downstream genes *CYP1B1* and *HDAC8*. Forced *AHR* and *ARNT1* showed an additive effect on HDAC8 expression. **E.** AHR expression induced by doxycycline increased HDAC8 expression but decreased p53 and RB1 expression in hepatoma cells. **F.** *AHR* activated luciferase activities driven by the HDAC8 promoter until promoter regions less than -168 bp.

compared with those transfected with the empty-vector control (Figure 5A). The hepatoma cells with HDAC8 expression showed a lesser degree of enhancement (30%) of BrdU incorporation than those overexpressing AHR. Hepatoma cells with both AHR and HDAC8 expression showed an additive effect on cell proliferation activity. Enhancement of cellular transformation activity by *AHR*, *CA1*, and *HDAC8* in HCC cells was observed in an independent soft agar assay (AIG), wherein overexpressed *AHR*, *CA1* mutant, and *HDAC8* significantly increased colony formation by 54%, 78%, and 42%, respectively, after induction by doxycycline (Figure 5B). The hepatoma cells exhibiting both *AHR* and *HDAC8* expression showed

a more pronounced additive effect on transformation activity than that of *AHR* or *HDAC8* alone.

To further evaluate the role of AHR-HDAC8 signaling in the proliferation and tumorigenesis of HCC, hepatoma cells treated with HDAC8-specific inhibitors, PCI-34051, and 1-Naphthohydroxamic acid (1-NTHX) [26, 27], showed enhanced expression of RB1 and p53, as well as a lower level of proliferative activity (Figure 5C and 5D). The tumor growth *in vivo* of hepatoma cells was also reduced in nude mice treated with the HDAC8-specific inhibitor PCI-34051 (5  $\mu$ M) for four weeks (Figure 5E), and the tumor mass in mice treated with PCI-34051 showed lower levels of

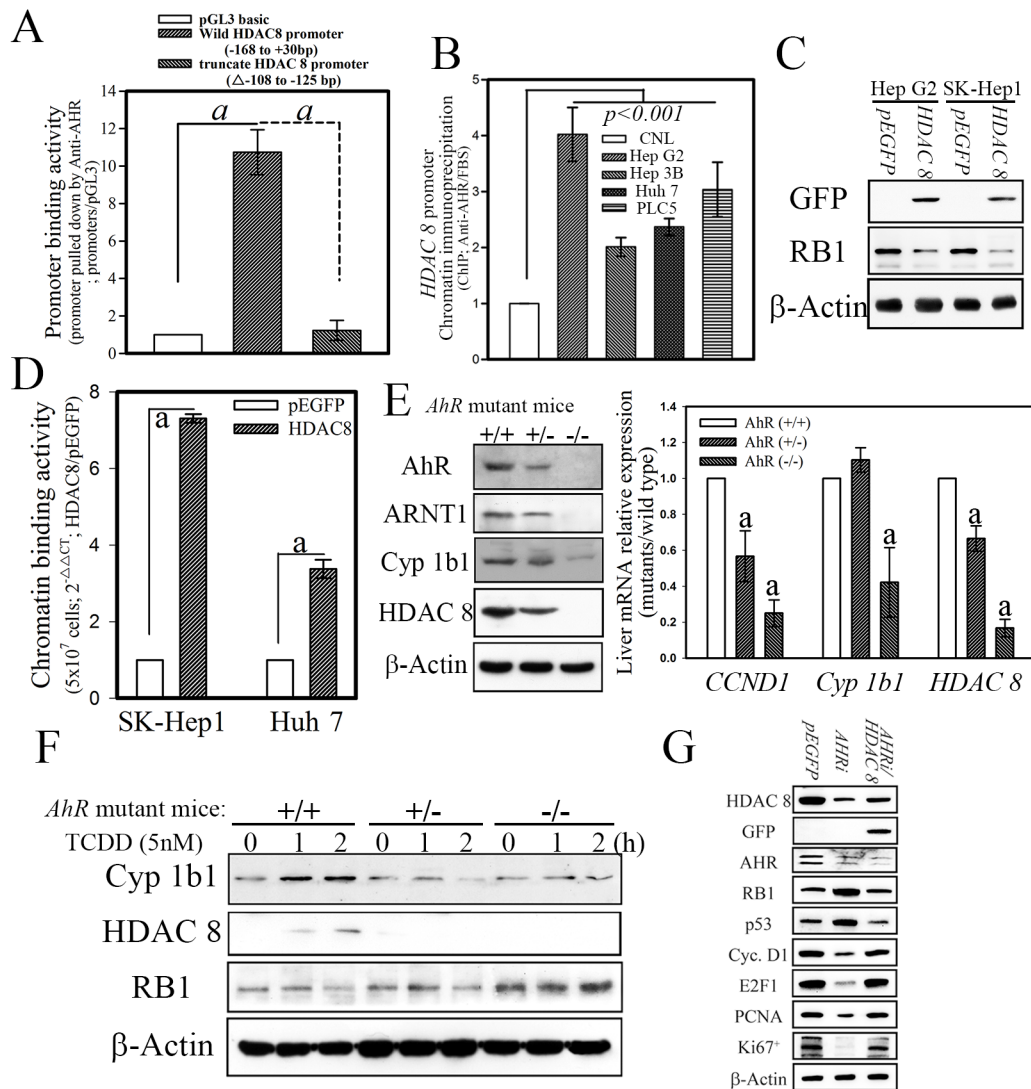

**Figure 4: AHR physiologically regulates HDAC8 expression in normal mouse hepatocytes.** a,  $p < 0.001$ . **A.** The *HDAC8* promoter with the -108 to -125 bp deletion abolished the promoter binding activity of AHR. **B.** Chromatin *HDAC8* promoter binding activity showed an AHR-dependent increase in hepatoma cells. The *HDAC8* promoter binding activity of the AHR complex in hepatoma cells determined with ChIP *in vivo*. **C.** Forced *HDAC8* downregulated RB1 expression. **D.** Forced *HDAC8* expression in hepatoma cells enhanced the chromatin binding activity of HDAC8 on the *RB1* promoter. **E.** HDAC8 expression in hepatocytes was abrogated in *Ahr*-null mice. **F.** The ablation of HDAC8 expression in hepatocytes showed involvement of *AHR*-dependent regulation. **G.** The hepatoma cells (SK-Hep1) transfected with HDAC8 showed to downregulate the enhancement on tumor suppressors, p53 and RB1, expression induced by cells transfected with *AHR* shRNAi.



proliferation marker (Cyclin D1, E2F1, PCNA and Ki 67<sup>+</sup>) expression than those treated with DMSO (0.1%) (Figure 5F) [28]. These results indicated that AHR and its target, HDAC8, play an important role in terms of promoting tumorigenesis of HCC.

## DISCUSSION

AHR, a unique chemical sensor activated by a large number of xenobiotics, has been considered a major regulator of xenobiotic-induced carcinogenesis,

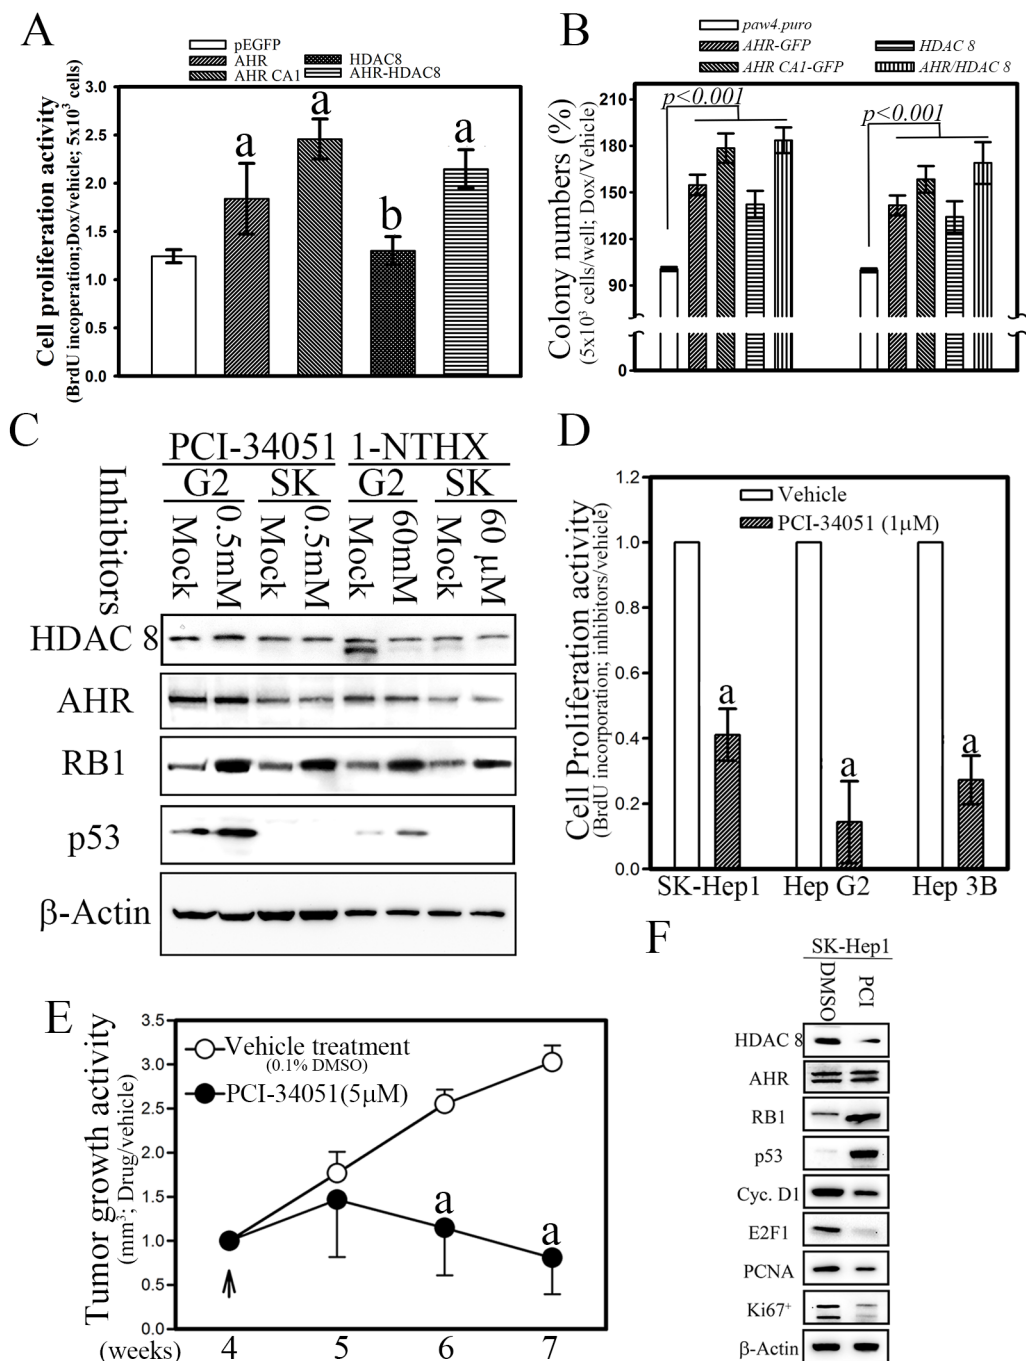

**Figure 5: Ectopic expression of AHR and HDAC8 is essential for cell proliferation and transformation in hepatoma cells.** b,  $p < 0.05$  and a,  $p < 0.001$ . **A.** Ectopic expression of *AHR* and *HDAC8* increased cell proliferation. CA1, constitutively activated *AHR* mutant. **B.** Ectopic expression of *AHR* and *HDAC8* significantly enhanced cellular transformation activities. **C.** The HDAC8-specific inhibitors PCI-34051 (1  $\mu$ M) and 1-NTHX (50  $\mu$ M) increased the expression of the tumor suppressors RB1 and p53. **D.** The HDAC8-specific inhibitor PCI-34051 repressed the cell proliferation activity of hepatoma cells *in vitro*. **E.** and **F.** The HDAC8-specific inhibitor PCI-34051 repressed cell proliferation and tumor growth activity of hepatoma cells with *HDAC8* over-expression in nude mice (7.4  $\mu$ g/kg body weight; twice per day).

but its role in the processes of tumor initiation and development remains to be elucidated. In this study, we showed that the inactivation of tumor suppressor *RB1* occurred by activation of AHR-HDAC8-axis signaling. In a panel of 289 HCC patients, *HDAC8* was shown to be highly correlated with *AHR* expression at both mRNA and protein levels. Genetically, AHR activated *HDAC8* expression via direct binding to the *HDAC8* promoter region and consequently downregulated tumor suppressor *RB1* expression. These results clearly show why chronic exposure of toxic environmental molecules may result in the development of hepatic neoplasia or malignant tumors.

Cancer is primarily an environmental disease with 90%–95% and 5%–10% of the cases being attributed to environmental and genetic factors, respectively [29]. Despite extensive research, environmental risk factors of cancer remain largely unknown. Many studies have shown that dysregulation of AHR in hepatocytes leads to steatosis and aberrant cholesterol metabolism [10], and increased expression of *AHR* has been noted in HCC [12], suggesting its potential pro-tumorigenic activity; however, the tumorigenic activity of AHR is still unclear. In this study, we provided further evidence that *AHR* expression influences HCC tumorigenicity by suppressing the expression of tumor suppressor *RB1*. This difference in genetic outcomes between the “low” and “high” *AHR* groups appeared to be determined by the change in expression levels of tumor the suppressor genes *p53* and *RB1* and of those of the proto-oncogenes *HDAC8*, *CCND1*, and *E2F1*. Evidence from our clinical data and analysis of tumor cells showed that high *AHR* expression directly enhanced its downstream gene-*HDAC8* expression, which led to low expression of tumor suppressors (*p53* and *RB1*); however, it was associated with higher levels of expression for proto-oncogenes (*CCND1* and *E2F1*) *in vitro* and *in vivo*. The results provided mechanistic evidence that the tumorigenic activation induced by high *AHR* expression is involved in HCC formation, suggesting a potential target for HCC therapy.

Inactivation of tumor suppressor activity of e.g., *RB1* and *p53* is the most frequent hallmark of cancer, including HCC [28, 30, 31]; however, the detailed regulatory mechanisms are still largely unknown. *RB1*, a classic tumor suppressor, is frequently inactivated in many malignances. In general, according to cancer genome studies, *RB1* was genetically inactivated in about 22% of patients with prostate cancer [32]. Evidence also indicates that the RB pathway is functionally inactivated in most cases of HCC by genetic, epigenetic, and/or viral mechanisms [33]; the activation of the RB pathway in a mouse model may prevent HCC development by maintaining the quiescence of adult liver progenitor cells [28, 34]. However, as evidenced by SNP analysis, genetic mutations of the *RB1* gene are relatively rare and few studies were focused on the inactivation of RB signaling in HCC. Recently, a systematic screen for the identification of

imprinted genes deregulated in human HCC revealed that *RB1* shows imprint abnormalities in a high proportion of primary patient samples [35, 36]. Forty percent of the HCC specimens (16/40) showed hyper- or hypo-methylation at the CpG island in intron 2 of the *RB1* gene [35]. In this study, we first showed that, beside methylation, promoter deacetylation of the *RB1* gene induced by HDAC8 represents another potential important mechanism for *RB1* inactivation in human HCC, complementing already well-described molecular defects. These results provide advanced epigenetic evidence of acetylation in *RB1* expression, a potential therapeutic target in HCC.

In summary, we demonstrated that AHR regulated cell proliferation and tumorigenesis by directly targeting and activating *HDAC8* expression in hepatoma cells. The strong correlation of mRNA and protein levels between AHR and HDAC8 in patients with HCC underscores the important regulatory role of the AHR signaling axis in HCC progression, suggesting its potential utility as a new therapeutic target and for developing preventive measures in HCC.

## MATERIALS AND METHODS

### Patients

This study enrolled 289 patients with hepatocellular carcinoma (HCC) from July 2007 to July 2015 from two medical centers (Chung Ho Memorial Hospital [255 patients] and Changhua Christian Hospital [34 patients]) with hepatitis B virus (HBV) and/or hepatitis C virus (HCV) infection and 243 non-HCC patients, of whom 85 were infected with HBV or HCV and 68 were not infected with either virus. Of these patients, 289 had adequate follow-up data for detailed analysis. The study of human subjects was approved by the Institutional Review Board of Kaohsiung Medical University (KMUHIRB-20130052; Kaohsiung, Taiwan).

### Animals and cell culture

Male BALB/c nu/nu mice were obtained from the National Laboratory of Animal Breeding and Research Center (Taipei, Taiwan) and housed according to the protocols of the Animal Center, Kaohsiung Medical University, Kaohsiung, Taiwan [37]. Normal hepatocyte cells (Chang normal liver cells; CNL) and human hepatoma cell lines (HepG2, Hep3B, SK-Hep1, Huh7, PLC/PRF/5, HCC 36 and HA22T) were obtained from American Type Culture Collection (Manassas, VA, USA) and maintained according to the manufacturer's protocol [38].

### Plasmids, cell lines, and other materials

Full-length *AHR* cDNA was amplified using PCR from a human testis cDNA library (GIBCO/BRL). The

*AHR* cDNA and a mutant *CAI* were each subcloned into the *pEGFP/CI* (pCDNA3/HA) vector (Clontech) or a Tet-on system (*pAW4.puro*, NCFPB, Taiwan) to express a GFP (HA)-tagged *AHR*. The *PLKO.1.puro* or *.neo* vector was used as a backbone for shRNAi constructs targeting *AHR* and *HDAC8* (NCFPB, Taiwan). SK-Hep1, Hep G2, Hep 3B, HA 22T, PLC cell lines were sub cultured and maintained according to American Type Culture Collection (ATCC) protocols. Transfection was performed using the Lipofectamine transfection kit (GIBCO/BRL).

### Western blotting and immunohistochemical analysis

Western blotting and immunohistochemical (fluorescence) staining were performed as previously described [37, 38]. The primary antibodies used in this study were *AHR* (RPT9), *HDAC8* (GeneTex), *RBI*, *p53*, *Cyclin D1*, *PCNA*, *ARNT1*, *CYP1B1* and *E2F1* (1:200), actin polyclonal antibodies (1:5000 dilution; Sigma–Aldrich), HA and GFP monoclonal antibodies (1:200 dilution; Upstate, NY, USA), FITC-conjugated anti-rabbit IgG, rhodamine-conjugated anti-mouse IgG, alkaline phosphatase-conjugated anti-rabbit IgG antibody (1:500 dilution; Jackson ImmunoResearch Laboratories), and Ki67 goat polyclonal antibody (1:200 dilution; Santa Cruz Biotechnology) [28]. All of the experiments were repeated at least three times, and staining with relevant control antibodies was performed in parallel and in all cases no signals were seen (for example, Supplementary Figure S1).

### Luciferase reporter assays

The *HDAC8* promoter (between positions –1101 and +30 bp) was cloned from human placenta genomic DNA and was used to construct a pGL3 luciferase reporter plasmid [28, 38]. The expression constructs and two reporter constructs, pSV40-Rluc and pGL3-*HDAC8*/Fire luciferase (Promega), were co-transfected with *pEGFP-AHR* into  $2 \times 10^5$  Hep 3B cells. The cells were harvested 16 h after the transfection, and the relative luciferase activity was measured according to the manufacturer's instructions. All data are expressed as the mean  $\pm$  SD of at least three experiments.

### Chromatin immunoprecipitation (ChIP) assays

Chromatin immunoprecipitation (ChIP) assays were performed as described previously [38]. All data are expressed as the mean  $\pm$  SD of at least three experiments. An *HDAC8* promoter fragment was amplified with the following primers: Primer 1, 5'-TTC ACT GGG CGT CCG CAG AG-3' and Primer 2, 5'-TGC CCC AAG CCT CCG CGA TC-3'. An *RBI* promoter fragment was amplified with the following primers: Primer 1, 5'-TTG

CCA TTG CTG CTG TCA C-3' and Primer 2, 5'-CGT CCT CCC AAA CCA TTC A-3'.

### Real-time PCR

The expression of *AHR* and *HDAC8* mRNA in hepatoma cells and cells from cancer patients were quantified using the SYBR Green Quantitative RT-PCR kit (Invitrogen) as described previously. Total RNA was extracted from the tumor mass using TRIzol reagent (Invitrogen) and transcribed into cDNA (Invitrogen) for PCR amplification using a 7900HT Thermocycler (Applied Biosystems Inc.). All procedures and data analyses were performed according to the manufacturer's instructions. Data on cells transfected with an empty *pEGFP* vector and samples from healthy subjects and drug-treated patients were analyzed and compared. All data are expressed as the mean  $\pm$  SD of at least three experiments.

### Anchorage-independent growth assays

Cells ( $10^4$  or  $5 \times 10^3$ ) in 1 mL of culture medium were mixed with an equal volume of 0.6% top agar and plated onto 60-mm culture dishes with 0.5% bottom agar [37, 38]. The plates were incubated at 37 °C for 2 weeks. Colonies were visualized by staining with 0.05% crystal violet acetate, and only those larger than 0.5 mm were counted. The culture medium was replaced every 3 days. All data are expressed as the mean  $\pm$  SD of at least three experiments.

### Assessment of the tumorigenic properties of *HDAC8* in nude mice

Male BALB/c nu/nu mice were inoculated (s.c. injection) with  $10^6$  of either scrambled vector or *HDAC8-GFP*-transfected overexpression cells on both sides of the back (10 mice per group) [37, 38]. Tumor size was measured using a caliper once or twice a week. Tumor volume was estimated according to the formula: volume ( $\text{cm}^3$ ) =  $(L \times W^2)/2$ , where L and W represent the length and width of the tumor, respectively. Tumor sizes were presented as means  $\pm$  SD.

### Statistical analysis

The quantitative variables are presented as means  $\pm$  SD. The statistical significance of differences was determined using a two-sample *t*-test. Pearson's correlation analysis was used to examine the relationship between expression levels of *AHR* and *HDAC8*. Statistical analysis of categorical variables was performed using chi-squared analysis, one-way analysis of variance (ANOVA), and Fisher's exact test. Differences with a *p* value  $< 0.05$  were considered statistically significant.

## ACKNOWLEDGMENTS

None.

## FUNDING

This work was supported in part by research grants NSC-102-2320-B-037-032-MY3 from the National Science Council, Taiwan, EOPP10-014 from the Ministry of Science and Technology and National Science Council, Taiwan. This work was supported, in part, by grants from National Health Research Institutes, Taiwan (EOPP10-014 and EOSP07-014). This study is also supported partially by Top Universities Grant, grant No. KMU-TP-104E10 and KMU-TP-104A10 from Kaohsiung Medical University.

## CONFLICTS OF INTEREST

The authors have no conflicts of interest.

## REFERENCES

- Liang Y, Li WW, Yang BW, Tao ZH, Sun HC, Wang L, Xia JL, Qin LX, Tang ZY, Fan J and Wu WZ. Aryl hydrocarbon receptor nuclear translocator is associated with tumor growth and progression of hepatocellular carcinoma. *Int J Cancer*. 2012; 130:1745-1754.
- Hao N and Whitelaw ML. The emerging roles of AhR in physiology and immunity. *Biochem Pharmacol*. 2013; 86:561-570.
- Cella M and Colonna M. Aryl hydrocarbon receptor: Linking environment to immunity. *Semin Immunol*. 2015; 27:310-314.
- Noakes R. The aryl hydrocarbon receptor: a review of its role in the physiology and pathology of the integument and its relationship to the tryptophan metabolism. *Int J Tryptophan Res*. 2015; 8:7-18.
- Wilson CL, Thomsen J, Hoivik DJ, Wormke MT, Stanker L, Holtzapple C and Safe SH. Aryl hydrocarbon (Ah) nonresponsiveness in estrogen receptor-negative MDA-MB-231 cells is associated with expression of a variant arnt protein. *Arch Biochem Biophys*. 1997; 346:65-73.
- Huai W, Zhao R, Song H, Zhao J, Zhang L, Zhang L, Gao C, Han L and Zhao W. Aryl hydrocarbon receptor negatively regulates NLRP3 inflammasome activity by inhibiting NLRP3 transcription. *Nat Commun*. 2014; 5:4738.
- Nguyen NT, Hanieh H, Nakahama T and Kishimoto T. The roles of aryl hydrocarbon receptor in immune responses. *Int Immunol*. 2013; 25:335-343.
- Nguyen NT, Nakahama T and Kishimoto T. Aryl hydrocarbon receptor and experimental autoimmune arthritis. *Semin Immunopathol*. 2013.
- Kawano Y, Nishiumi S, Tanaka S, Nobutani K, Miki A, Yano Y, Seo Y, Kutsumi H, Ashida H, Azuma T and Yoshida M. Activation of the aryl hydrocarbon receptor induces hepatic steatosis via the upregulation of fatty acid transport. *Arch Biochem Biophys*. 2010; 504:221-227.
- Tanos R, Patel RD, Murray IA, Smith PB, Patterson AD and Perdew GH. Aryl hydrocarbon receptor regulates the cholesterol biosynthetic pathway in a dioxin response element-independent manner. *Hepatology*. 2012; 55:1994-2004.
- Tanos R, Murray IA, Smith PB, Patterson A and Perdew GH. Role of the Ah receptor in homeostatic control of fatty acid synthesis in the liver. *Toxicol Sci*. 2012; 129:372-379.
- Liu Z, Wu X, Zhang F, Han L, Bao G, He X and Xu Z. AhR expression is increased in hepatocellular carcinoma. *J Mol Histol*. 2013; 44:455-461.
- West AC and Johnstone RW. New and emerging HDAC inhibitors for cancer treatment. *J Clin Invest*. 2014; 124:30-39.
- Robert C and Rassool FV. HDAC inhibitors: roles of DNA damage and repair. *Adv Cancer Res*. 2012; 116:87-129.
- Muller S and Kramer OH. Inhibitors of HDACs--effective drugs against cancer? *Curr Cancer Drug Targets*. 2010; 10:210-228.
- Yang XJ and Seto E. HATs and HDACs: from structure, function and regulation to novel strategies for therapy and prevention. *Oncogene*. 2007; 26:5310-5318.
- Gallinari P, Di Marco S, Jones P, Pallaoro M and Steinkuhler C. HDACs, histone deacetylation and gene transcription: from molecular biology to cancer therapeutics. *Cell Res*. 2007; 17:195-211.
- Chun JY and Ho CS. Management of Pericardial Effusion following Cardiac Perforation during Radiofrequency Ablation of Hepatocellular Carcinoma. *Seminars in interventional radiology*. 2014; 31:101-103.
- Costello LC and Franklin RB. The status of zinc in the development of hepatocellular cancer: an important, but neglected, clinically established relationship. *Cancer Biol Ther*. 2014; 15:353-360.
- Deardorff MA, Bando M, Nakato R, Watrin E, Itoh T, Minamino M, Saitoh K, Komata M, Katou Y, Clark D, Cole KE, De Baere E, Decroos C, Di Donato N, Ernst S, Francey LJ, et al. HDAC8 mutations in Cornelia de Lange syndrome affect the cohesin acetylation cycle. *Nature*. 2012; 489:313-317.
- Tian Y, Wong VW, Wong GL, Yang W, Sun H, Shen J, Tong JH, Go MY, Cheung YS, Lai PB, Zhou M, Xu G, Huang TH, Yu J, To KF, Cheng AS, et al. Histone Deacetylase HDAC8 Promotes Insulin Resistance and beta-Catenin Activation in NAFLD-Associated Hepatocellular Carcinoma. *Cancer Res*. 2015; 75:4803-4816.
- Rettig I, Koeneke E, Trippel F, Mueller WC, Burhenne J, Kopp-Schneider A, Fabian J, Schober A, Fernekorn U, von Deimling A, Deubzer HE, Milde T, Witt O and Oehme I. Selective inhibition of HDAC8 decreases neuroblastoma growth in vitro and in vivo and enhances retinoic acid-mediated differentiation. *Cell Death Dis*. 2015; 6:e1657.

23. Kang Y, Nian H, Rajendran P, Kim E, Dashwood WM, Pinto JT, Boardman LA, Thibodeau SN, Limburg PJ, Lohr CV, Bisson WH, Williams DE, Ho E and Dashwood RH. HDAC8 and STAT3 repress BMF gene activity in colon cancer cells. *Cell Death Dis.* 2014; 5:e1476.
24. Chao MW, Chu PC, Chuang HC, Shen FH, Chou CC, Hsu EC, Himmel LE, Huang HL, Tu HJ, Kulp SK, Teng CM and Chen CS. Non-epigenetic function of HDAC8 in regulating breast cancer stem cells by maintaining Notch1 protein stability. *Oncotarget.* 2016; 7:1796-807. doi: 10.18632/oncotarget.6427.
25. Borlak J and Jenke HS. Cross-talk between aryl hydrocarbon receptor and mitogen-activated protein kinase signaling pathway in liver cancer through c-raf transcriptional regulation. *Mol Cancer Res.* 2008; 6:1326-1336.
26. Levandowsky M and Hutner SH. Utilization of Fe<sup>3+</sup> by the inshore colorless marine dinoflagellate *Cryptocodinium cohnii*. *Ann N Y Acad Sci.* 1975; 245:16-25.
27. Balasubramanian S, Ramos J, Luo W, Sirisawad M, Verner E and Buggy JJ. A novel histone deacetylase 8 (HDAC8)-specific inhibitor PCI-34051 induces apoptosis in T-cell lymphomas. *Leukemia.* 2008; 22:1026-1034.
28. Wang SN, Wang LT, Sun DP, Chai CY, Hsi E, Kuo HT, Yokoyama KK and Hsu SH. Intestine-specific homeobox (ISX) upregulates E2F1 expression and related oncogenic activities in HCC. *Oncotarget.* 2016; 7:36924-36939. doi: 10.18632/oncotarget.9228.
29. Gravitz L. Introduction: a smouldering public-health crisis. *Nature.* 2011; 474:S2-4.
30. Indovina P, Pentimalli F, Casini N, Vocca I and Giordano A. RB1 dual role in proliferation and apoptosis: cell fate control and implications for cancer therapy. *Oncotarget.* 2015; 6:17873-17890. doi: 10.18632/oncotarget.4286.
31. Zhu L, Lu Z and Zhao H. Antitumor mechanisms when pRb and p53 are genetically inactivated. *Oncogene.* 2015; 34:4547-4557.
32. Udayakumar T, Shareef MM, Diaz DA, Ahmed MM and Pollack A. The E2F1/Rb and p53/MDM2 pathways in DNA repair and apoptosis: understanding the crosstalk to develop novel strategies for prostate cancer radiotherapy. *Semin Radiat Oncol.* 2010; 20:258-266.
33. Lin Y, Shi CY, Li B, Soo BH, Mohammed-Ali S, Wee A, Oon CJ, Mack PO and Chan SH. Tumour suppressor p53 and Rb genes in human hepatocellular carcinoma. *Ann Acad Med Singapore.* 1996; 25:22-30.
34. Viatour P, Ehmer U, Saddic LA, Dorrell C, Andersen JB, Lin C, Zmoos AF, Mazur PK, Schaffer BE, Ostermeier A, Vogel H, Sylvester KG, Thorgeirsson SS, Grompe M and Sage J. Notch signaling inhibits hepatocellular carcinoma following inactivation of the RB pathway. *J Exp Med.* 2011; 208:1963-1976.
35. Li L, Tang J, Zhang B, Yang W, Liu Gao M, Wang R, Tan Y, Fan J, Chang Y, Fu J, Jiang F, Chen C, Yang Y, Gu J, Wu D, Guo L, et al. Epigenetic modification of MiR-429 promotes liver tumour-initiating cell properties by targeting Rb binding protein 4. *Gut.* 2015; 64:156-167.
36. Zhang JC, Gao B, Yu ZT, Liu XB, Lu J, Xie F, Luo HJ and Li HP. Promoter hypermethylation of p14 (ARF), RB, and INK4 gene family in hepatocellular carcinoma with hepatitis B virus infection. *Tumour Biol.* 2014; 35:2795-2802.
37. Chiou SS, Wang LT, Huang SB, Chai CY, Wang SN, Liao YM, Lin PC, Liu KY and Hsu SH. Wntless (GPR177) expression correlates with poor prognosis in B-cell precursor acute lymphoblastic leukemia via Wnt signaling. *Carcinogenesis.* 2014; 35:2357-2364.
38. Hsu SH, Wang LT, Lee KT, Chen YL, Liu KY, Suen JL, Chai CY and Wang SN. Proinflammatory homeobox gene, ISX, regulates tumor growth and survival in hepatocellular carcinoma. *Cancer Res.* 2013; 73:508-518.
