# Supplementary material for: Aryl hydrocarbon receptor regulates histone deacetylase 8 expression to repress tumor suppressive activity in hepatocellular carcinoma
Source: PubMed Central journal article supplement (PMC5352337; doi:10.18632/oncotarget.9841), 2016-06-06
Supplement: oncotarget-08-7489-s001.pdf [file oncotarget-08-7489-s001.pdf]

## Aryl hydrocarbon receptor regulates histone deacetylase 8 expression to repress tumor suppressive activity in hepatocellular carcinoma

### SUPPLEMENTARY FIGURE

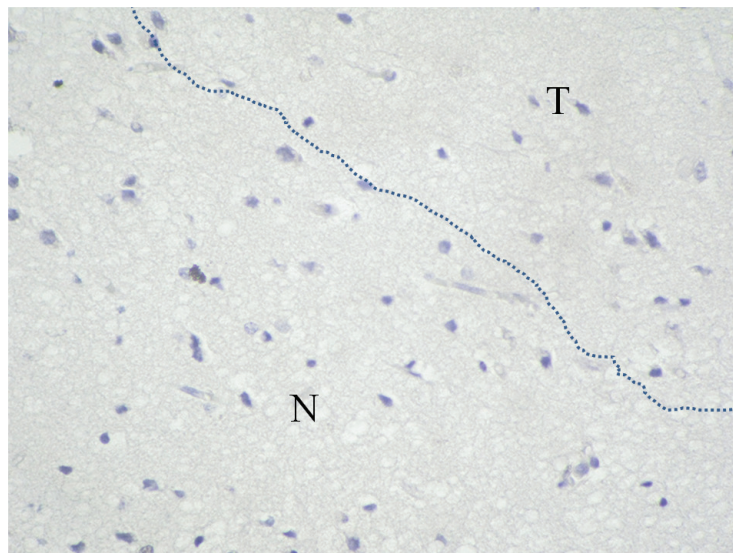

**Supplementary Figure S1: The immunohistochemistry staining of HCC tumors by mouse IgG.** N, normal liver cell; T, tumors.
